# Supplementary material
Source: Research Square preprint supplement (doi:10.21203/rs.3.rs-9698132/v1)
Supplement: Supplementary file 1 [file 3822a637857c7331a42a38cf.docx]

| Family | | Types of leukemia | Age at diagnosis  (years) | Karyotype | Chimeric transcript |
| --- | --- | --- | --- | --- | --- |
| A | Ⅱ-1 | BCP-ALL | 7 | t(11;19)(q23;p13) | *KMT2A-MLLT1* |
| Ⅱ-2 | Infant ALL | 0 | t(4;11)(q21;q23) | *KMT2A-AFF1* |
| B | Ⅱ-1 | BCP-ALL | 11 | 46,XY | none |
| Ⅱ-3 | BCP-ALL | 6 | 46,XX | none |
| C | Ⅱ-1 | BCP-ALL | 3 | t(12;21)(p13;q22) | *ETV6-RUNX1* |
| Ⅱ-2 | BCP-ALL | 4 | t(12;21)(p13;q22) | *ETV6-RUNX1* |
| D | Ⅱ-1 | BCP-ALL | 8 | 46,XX | none |
| Ⅲ-1 | BCP-ALL | 0 | 45, XX, -6, der(7)t(6;7)(p11;q11.2),  der(9)t(7;9)(q11.2;p13), add(15)(q24) | none |
| E | Ⅲ-2 | AML | 12 | t(16;21)(p11.2;q22) | *FUS-ERG* |
| Ⅲ-3 | AML | 2 | 45,XX,,10,der(11)t(10;11)(q11.2;q23),  del(12)(p11.2) | *KMT2A-MLLT10* |

**Table 1. Clinical characteristics of patients with familial leukemia**

ALL: acute lymphoblastic leukemia; BCP-ALL: B-cell precursor acute lymphoblastic leukemia; AML: acute myeloid leukemia
